# Supplementary material for: A chemical threshold controls nanocrystallization and degassing behaviour in basalt magmas
Source: Springer Nature journal article supplement (doi:10.1038/s43247-022-00615-2), 2022-11-18
Supplement: 43247_2022_615_MOESM1_ESM.pdf [file 43247_2022_615_MOESM1_ESM.pdf]

## **Description of Additional Supplementary Files**

**File Name:** Supplementary Data 1

**Description:** Raman spectra and DSC traces
