# Supplementary material for: A chemical threshold controls nanocrystallization and degassing behaviour in basalt magmas
Source: Springer Nature journal article supplement (doi:10.1038/s43247-022-00615-2), 2022-11-18
Supplement: 43247_2022_615_MOESM2_ESM.pdf [file 43247_2022_615_MOESM2_ESM.pdf]

# A chemical threshold controls nanocrystallization and degassing behaviour in basalt magmas

Alex Scarani<sup>1\*</sup>, Alessio Zandonà<sup>2,3\*</sup>, Fabrizio Di Fiore<sup>1</sup>, Pedro Valdivia<sup>4</sup>, Rizaldi Putra<sup>4</sup>, Nobuyoshi Miyajima<sup>4</sup>, Hansjörg Bornhöft<sup>3</sup>, Alessandro Vona<sup>1</sup>, Joachim Deubener<sup>3</sup>, Claudia Romano<sup>1</sup>, Danilo Di Genova<sup>5</sup>

<sup>1</sup> Dipartimento di Scienze, Università degli Studi Roma Tre, Largo San L. Murialdo 1, 00146 Rome, Italy

<sup>2</sup> CNRS, CEMHTI UPR3079, Univ. Orléans, F-45071 Orléans, France

<sup>3</sup> Institute of Non-metallic Materials, Clausthal University of Technology, Zehntnerstraße 2a, D-38678 Clausthal-Zellerfeld, Germany

<sup>4</sup> Bavarian Research Institute of Experimental Geochemistry and Geophysics (BGI), University of Bayreuth, Universitätsstraße 30, 95440, Bayreuth, Germany

<sup>5</sup> Institute of Environmental Geology and Geoengineering, National Research Council of Italy, Rome, Italy

\*Corresponding authors: alex.scarani@uniroma3.it; alessio.zandona@tu-clausthal.de

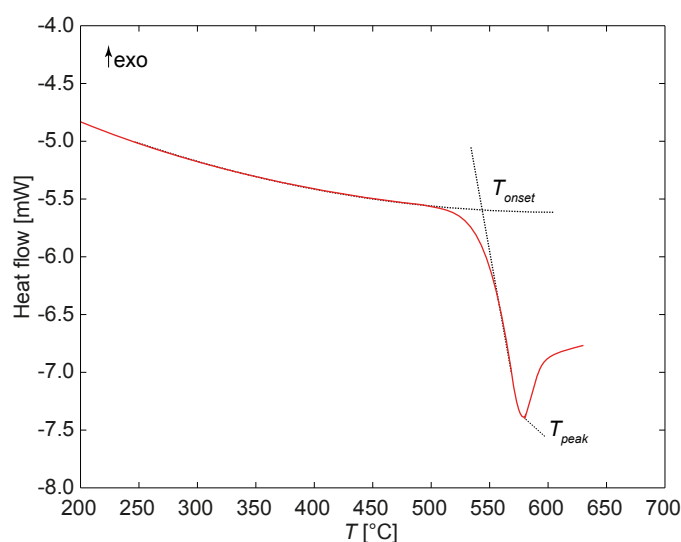

**Supplementary Figure 1.** Measured heat flow as a function of temperature for DGG-1<sup>1</sup> standard glass at a heating rate of 10 K min<sup>-1</sup>, following a cooling rate of 10 K min<sup>-1</sup> through the glass transition region. The characteristic glass transition temperatures used in this study ( $T_{onset}$  and  $T_{peak}$ ) are shown in the figure.

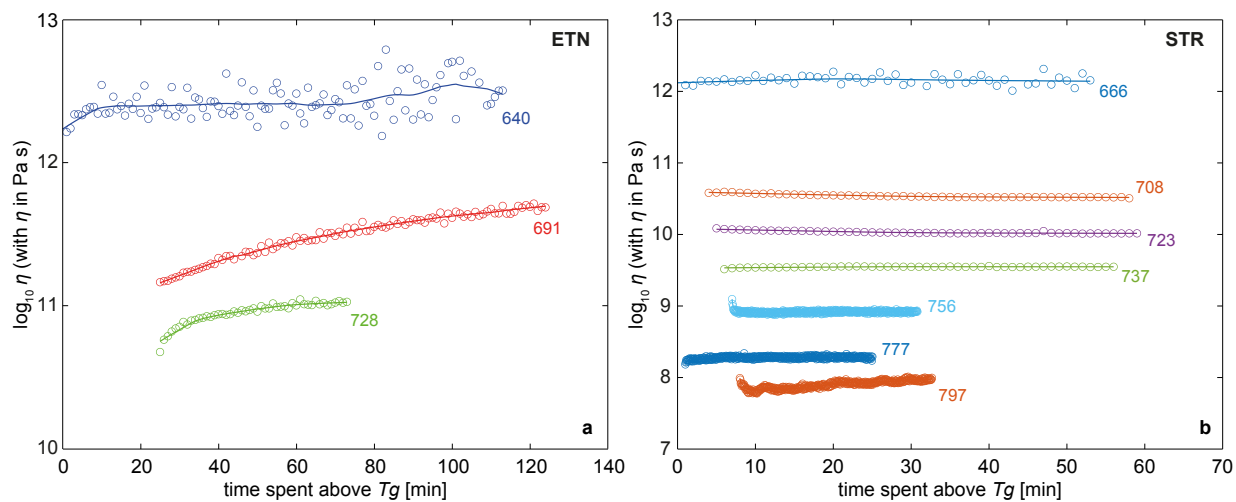

**Supplementary Figure 2.** Viscosity measured over time by micropenetration viscometry (MP) for (a) ETN and (b) STR. Labels represent the temperature of the viscosity measurement. Lines represent smoothing of experimental data.

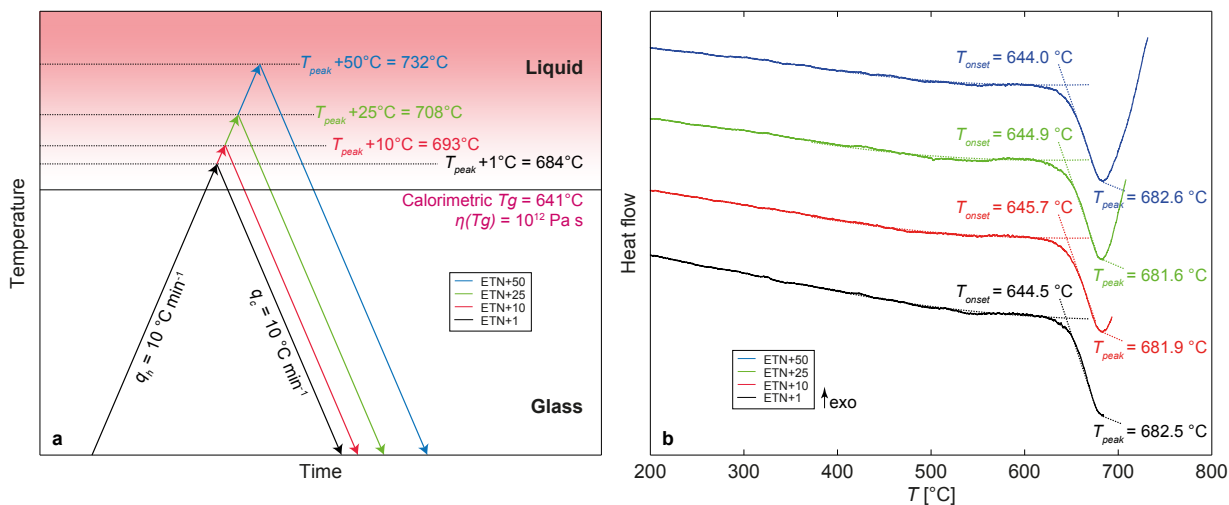

**Supplementary Figure 3.** Illustration of the controlled heat treatments (a) performed on ETN using a DSC to study its low-temperature phase separation and crystallization behaviour (b). Recovered samples were analysed by Raman spectroscopy and transmission electron microscopy.

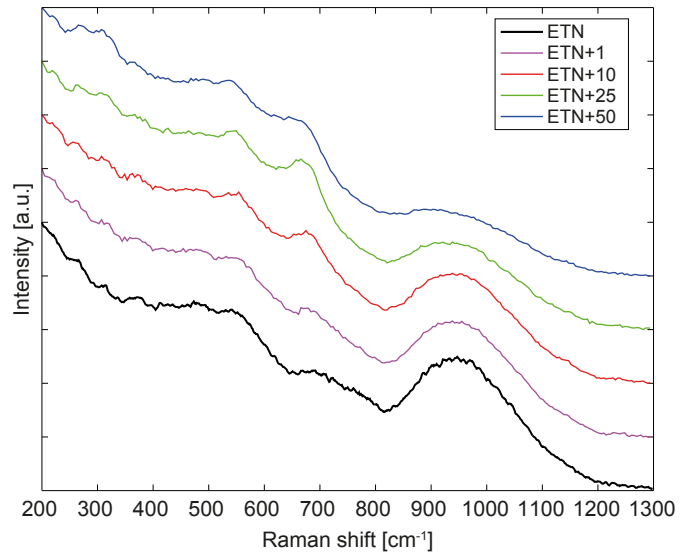

**Supplementary Figure 4.** Normalized Raman spectra of ETN samples before (thick curve) and after controlled heat treatments as illustrated in Supplementary Fig. 3.

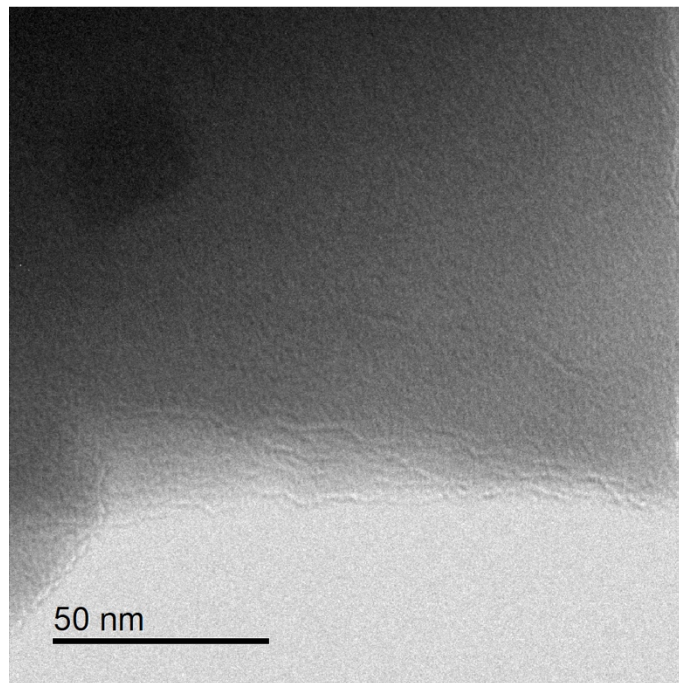

**Supplementary Figure 5.** High resolution TEM micrograph obtained from Mt. Etna starting glass (ETN), confirming the absence of nanoscale heterogeneities within instrumental resolution.

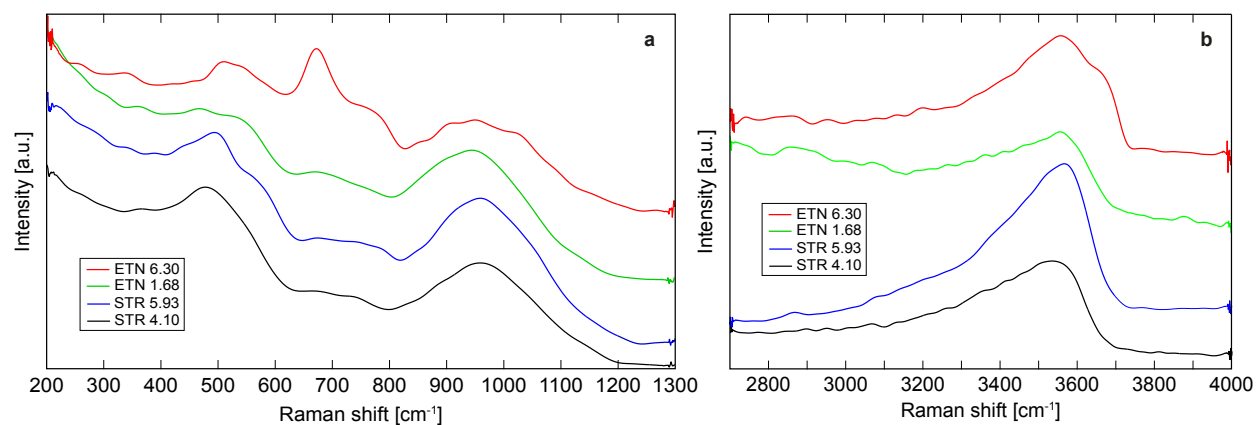

**Supplementary Figure 6.** Normalized Raman spectra of ETN and STR hydrous samples after high-temperature and -pressure experiments. Samples show (a) different nanolites contribution at  $\sim 300$  and  $\sim 660$   $\text{cm}^{-1}$ , and (b) different water content at  $\sim 3650$   $\text{cm}^{-1}$ .

| Oxide                          | <sup>a</sup> ETN (wt %) | <sup>a</sup> STR (wt %) |
|--------------------------------|-------------------------|-------------------------|
| SiO <sub>2</sub>               | 48.92 (0.21)            | 51.06 (0.39)            |
| TiO <sub>2</sub>               | 1.67 (0.05)             | 0.91 (0.10)             |
| Al <sub>2</sub> O <sub>3</sub> | 16.75 (0.18)            | 17.52 (0.28)            |
| FeO <sub>tot.</sub>            | 10.05 (0.17)            | 7.58 (0.25)             |
| MnO                            | 0.20 (0.04)             | 0.17 (0.07)             |
| MgO                            | 5.77 (0.09)             | 6.02 (0.20)             |
| CaO                            | 10.44 (0.16)            | 11.29 (0.29)            |
| Na <sub>2</sub> O              | 3.74 (0.07)             | 2.70 (0.19)             |
| K <sub>2</sub> O               | 1.92 (0.06)             | 2.12 (0.12)             |
| P <sub>2</sub> O <sub>5</sub>  | 0.55 (0.10)             | 0.64 (0.27)             |

<sup>a</sup>Numbers in parenthesis indicate the error ( $\pm 1\sigma$ ).

**Supplementary Table 1.** Chemical composition (wt.%) of the investigated glasses.

| Sample | Measurement | Temperature (°C) | $\eta$ (Pa s) |
|--------|-------------|------------------|---------------|
| ETN    | MP          | 635              | 12.17*        |
|        |             | 640              | <i>12.50</i>  |
| ETN    | MP          | 689              | 11.19*        |
|        |             | 691              | <i>11.69</i>  |
| ETN    | MP          | 726              | 10.68*        |
|        |             | 728              | <i>11.03</i>  |
| ETN    | CC          | 1400             | 0.62          |
| ETN    | CC          | 1375             | 0.71          |
| ETN    | CC          | 1350             | 0.85          |
| ETN    | CC          | 1325             | 0.97          |
| ETN    | CC          | 1300             | 1.10          |
| ETN    | CC          | 1275             | 1.21          |
| ETN    | CC          | 1250             | 1.34          |
| ETN    | CC          | 1225             | 1.47          |
| STR    | MP          | 666              | 12.18         |
| STR    | MP          | 708              | 10.52         |
| STR    | MP          | 723              | 10.02         |
| STR    | MP          | 737              | 9.55          |
| STR    | MP          | 756              | 8.92          |
| STR    | MP          | 777              | 8.28          |
| STR    | MP          | 795              | 7.82*         |
|        |             | 797              | <i>7.97</i>   |
| STR    | CC          | 1227             | 1.92          |
| STR    | CC          | 1266             | 1.68          |
| STR    | CC          | 1295             | 1.51          |
| STR    | CC          | 1312             | 1.41          |
| STR    | CC          | 1343             | 1.25          |
| STR    | CC          | 1361             | 1.17          |
| STR    | CC          | 1405             | 0.96          |
| STR    | CC          | 1432             | 0.84          |

**Supplementary Table 2.** Measured viscosity for ETN and STR using micropenetration (MP) and concentric cylinder (CC) viscometry, respectively. When viscosity increased with time due to nanocrystallization, the lowest measured viscosity is reported with the symbol \*, whereas the highest measured viscosity at the end of the measurement is reported in italics.

### Supplementary references

1. Meurlender, G. Viskositäts-Temperaturverhalten des Standardglases I der DGG. *Glas. Ber.* **47**, 1–3 (1974).
